# Supplementary material
Source: ML conference proceedings conference paper supplement (https://openaccess.thecvf.com/content/CVPR2023/html/Han_Noisy_Correspondence_Learning_CVPR_2023_paper.html)
Supplement: Supplementary file 1 [file Han_Noisy_Correspondence_Learning_CVPR_2023_supplemental.pdf]

# Supplementary Material

## 1. Ablation Studies On Data Selection

In this section, we analyze the performance of our MSCN under different data selection strategy, *i.e.*, GMM and BMM. The experiments are conducted on the Flickr30K with 20% noisy correspondence. The results in Tab.1 demonstrate that our MSCN is effective to the choice of data selection strategy. And our proposed meta-data guided method brings the best results.

Table 1. Ablation studies on Flickr30K with 20% noise rate.

| Image to Text |             |             |             |              |
|---------------|-------------|-------------|-------------|--------------|
| Methods       | R@1         | R@5         | R@10        | SUM          |
| GMM           | 76.3        | 94.5        | 97.1        | 267.9        |
| BMM           | 76.8        | 94.7        | 96.8        | 268.3        |
| Ours          | <b>77.4</b> | <b>94.9</b> | <b>97.6</b> | <b>269.9</b> |
| Text to Image |             |             |             |              |
| Methods       | R@1         | R@5         | R@10        | SUM          |
| GMM           | 58.7        | 82.8        | 89.0        | 230.5        |
| BMM           | 59.3        | 83.0        | 89.2        | 231.5        |
| Ours          | <b>59.6</b> | <b>83.2</b> | <b>89.2</b> | <b>232.0</b> |

## 2. Experiments on MS-COCO 5K

In this section, we evaluate our trained MSCN on the full 5K test set with different noise ratio, *i.e.*, 20%, 50% and 70%. The results are shown in Tab.2

Table 2. Performance of MSCN on MS-COCO full 5K test set with 20%, 50% and 70% noise ratio.

| Image to Text |      |      |      |  |
|---------------|------|------|------|--|
| Noisy Ratio   | R@1  | R@5  | R@10 |  |
| 20%           | 57.1 | 84.0 | 90.8 |  |
| 50%           | 54.3 | 82.2 | 88.7 |  |
| 70%           | 51.4 | 80.3 | 87.6 |  |
| Text to Image |      |      |      |  |
| Noisy Ratio   | R@1  | R@5  | R@10 |  |
| 20%           | 41.0 | 69.8 | 80.3 |  |
| 50%           | 38.4 | 67.4 | 78.5 |  |
| 70%           | 36.5 | 65.6 | 77.0 |  |

## 3. Generating of Synthetic Noise

To evaluate our method on a range of noise ratios, we generate the synthetic noisy correspondence data from Flickr30K and MS-COCO. Specifically, we randomly generate a mismatched index list to construct noisy pairs. Here, we provide a pseudo-code to describe the generating of synthetic noisy data:

```
1 def generate_noisy_correspondence(images,
2   captions, data_length, noise_ratio):
3   '''
4   images: original image data
5   captions: original text data
6   corresponding to images
7   data_length: the length of data
8   noise_ratio: the ratio of produced
9   synthetic noise
10  '''
11  t2i_index = np.arange(0, data_length)
12  #random produce mismatched idxs
13  idx = np.arange(data_length)
14  np.random.shuffle(idx)
15  noise_length = int(noise_ratio *
16  data_length)
17  shuffle_index = t2i_index[idx[:
18  noise_length]]
19  np.random.shuffle(shuffle_index)
20  t2i_index[idx[:noise_length]] =
21  shuffle_index
22  #fixing captions, and using the
23  mismatched idxs to get images
24  images = images[t2i_index]
25  captions = captions
26  return images, captions
```

## 4. Training Algorithm of MSCN

Algorithm 1 summarizes our proposed MSCN.

---

**Algorithm 1:** The MSCN Training Algorithm

---

**Input:** Training set  $\mathcal{D}_{train}$ , meta-data set  $\mathcal{D}_{meta}$ , models  $\mathcal{M}^{(1)} = \{\mathcal{F}_W^{(1)}, \mathcal{V}_\Theta^{(1)}\}$  and  $\mathcal{M}^{(2)} = \{\mathcal{F}_W^{(2)}, \mathcal{V}_\Theta^{(2)}\}$ , batch size  $n$  and  $m$ , learning rate  $\alpha$  and  $\beta$ .

- 1  $\mathcal{M}^{(1)}, \mathcal{M}^{(2)} \leftarrow \text{WarmUp}(\mathcal{D}_{train}, \mathcal{M}^{(1)}, \mathcal{M}^{(2)})$
- 2 **while**  $e < \text{MaxEpoch}$  **do**
- 3     Construct negative meta-data and extend the meta-data set as  $\mathcal{D}'_{meta}$ .
- 4      $\{\mathcal{S}_p^{(1)}, \mathcal{S}_N^{(1)}\} \leftarrow \text{GetSimilarityScore}(\mathcal{D}'_{meta}, \mathcal{M}^{(1)})$ .
- 5      $\{\mathcal{S}_p^{(2)}, \mathcal{S}_N^{(2)}\} \leftarrow \text{GetSimilarityScore}(\mathcal{D}'_{meta}, \mathcal{M}^{(2)})$ .
- 6     Initialize  $BMM^{(1)}$  using  $\{\mathcal{S}_p^{(1)}, \mathcal{S}_N^{(1)}\}$ .
- 7     Initialize  $BMM^{(2)}$  using  $\{\mathcal{S}_p^{(2)}, \mathcal{S}_N^{(2)}\}$ .
- 8      $P^{(2)} = \{p_i\}_{i=1}^N \leftarrow BMM^{(1)}(\mathcal{D}_{train}, \mathcal{M}^{(1)})$ .
- 9      $P^{(1)} = \{p_i\}_{i=1}^N \leftarrow BMM^{(2)}(\mathcal{D}_{train}, \mathcal{M}^{(2)})$ .
- 10    **for**  $K = 1, 2$  **do**
- 11      $\mathcal{D}'_{train}^{(K)} = \{(I_i, T_i) \mid p_i > 0.5, \forall (I_i, T_i, p_i) \in (\mathcal{D}_{train}, P^{(K)})\}$ .
- 12     **while**  $t < \text{MaxIteration}$  **do**
- 13         From  $\mathcal{D}'_{train}^{(K)}$  sample a training mini-batch  $\{(I_i, T_i)\}_{i=1}^n$ .
- 14         From  $\mathcal{D}'_{meta}$  sample a meta mini-batch  $\{(I_i, T_i, y_i)\}_{i=1}^m$ .
- 15         Compute the updated parameters for  $\mathcal{M}^{(K)}$  with training batch:  
            $\hat{W}^{(t)}(\Theta) = W^{(t)} - \alpha \sum_{i=1}^n \nabla_W l^{train}(I_i, T_i)|_{W^{(t)}}$ .
- 16         Update the meta-net  $\mathcal{V}_\Theta^{(K)}$  with meta batch:  
            $\Theta^{(t+1)} = \Theta^{(t)} - \beta \frac{1}{m} \sum_{i=1}^m \nabla_\Theta l^{meta}(I_i, T_i, y_i)|_{\Theta^{(t)}}$ .
- 17         Update the main net  $\mathcal{F}_W^{(K)}$  parameters with training batch:  
            $W^{(t+1)} = W^{(t)} - \alpha \sum_{i=1}^n \nabla_W l^{train}(I_i, T_i)|_{W^{(t)}}$ .
- 18     **end**
- 19 **end**
- 20 **end**

---
